## RESEARCH ARTICLE

# Sole and combined effect of foliar zinc and arbuscular mycorrhizae inoculation on basmati rice growth, productivity and grains nutrient

Hassan Mehmood<sup>1</sup>, Muhammad Arif Ali<sup>1\*</sup>, Saddam Hussain<sup>2</sup>, Khurram Shehzad Baig<sup>3</sup>, Haider Sultan<sup>4</sup>, Syed Atif Hasan Naqvi<sup>5</sup>, Muhammad Nadeem Shahid<sup>5</sup>, Shamsher Ali<sup>6</sup>, Eman A. Alhomaidi<sup>7</sup>, Rahul Datta<sup>8</sup>

**1** Department of Soil Science, Faculty of Agricultural Sciences and Technology, Bahauddin Zakariya University, Multan, Punjab, Pakistan, **2** Department of Agronomy, University of Agriculture, Faisalabad, Punjab, Pakistan, **3** Soil & Water Testing Laboratory, Muzaffargarh, Punjab, Pakistan, **4** Hainan Key Laboratory for Sustainable Utilization of Tropical Bioresource, College of Tropical Crops, Hainan University, Haikou, China, **5** Department of Plant Pathology, Faculty of Agricultural Sciences and Technology, Bahauddin Zakariya University, Multan, Pakistan, **6** Department of Soil and Environmental Sciences, Amir Muhammad Khan Campus Mardan, The University of Agriculture Peshawar, Khyber Pakhtunkhwa, Pakistan, **7** Department of Biology College of Science, Princess Nourah Bint Abdulrahman University, Riyadh, Saudi Arabia, **8** Department of Geology and Pedology, Faculty of Forestry and Wood Technology, Mendel University in Brno, Brno, Czech Republic

\* [arif1056@bzu.edu.pk](mailto:arif1056@bzu.edu.pk)

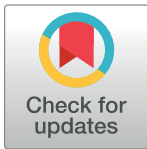

## OPEN ACCESS

**Citation:** Mehmood H, Ali MA, Hussain S, Baig KS, Sultan H, Hasan Naqvi SA, et al. (2022) Sole and combined effect of foliar zinc and arbuscular mycorrhizae inoculation on basmati rice growth, productivity and grains nutrient. PLoS ONE 17(4): e0266248. <https://doi.org/10.1371/journal.pone.0266248>

**Editor:** Shah Fahad, The University of Haripur, PAKISTAN

**Received:** February 7, 2022

**Accepted:** March 16, 2022

**Published:** April 29, 2022

**Copyright:** © 2022 Mehmood et al. This is an open access article distributed under the terms of the [Creative Commons Attribution License](https://creativecommons.org/licenses/by/4.0/), which permits unrestricted use, distribution, and reproduction in any medium, provided the original author and source are credited.

**Data Availability Statement:** All relevant data are within the manuscript.

**Funding:** This work was funded by Princess Nourah bint Abdulrahman University Researchers Supporting Project number (PNURSP2022R317), Princess Nourah bint Abdulrahman University, Riyadh, Saudi Arabia.

**Competing interests:** The authors have declared that no competing interests exist.

## Abstract

Mismanagement in foliar fertilizer application at different crop stages decreases the productivity of the crop. Likewise, higher application of phosphorus (P) beyond recommended application rates not only decrease zinc (Zn) uptake in rice but also increase fertilizer use cost. Inoculation of arbuscular mycorrhizae (AMF) may optimize the uptake of P and improve crops production via organic secretions. That's why the current study was conducted to examine the individual and coordinated effects of 0.5% Zn (0.5Zn) foliar spray (tillering (T) and/or panicle (P) initiation stage) and AMF application. Application of foliar 0.5Zn at tillering+panicle stage remained significantly better for significant enhancement in plant height, spike length, gas exchange attributes and total chlorophyll contents than control. A significant decrease in electrolyte leakage Also validated the effectiveness of treatment 0.5ZnT+P compared to control. Compared to control, the maximum increase in N (14.5 and 25.7%), P (42.1 and 33.3%), K (22.2 and 30.0%) and Zn (19.3 and 27.8%) accumulation was also found in 0.5ZnT+P, with and without AMF, respectively. In conclusion, 0.5ZnT+P with AMF is a better approach than sole application of Zn at tillering or panicle initiation stages. Nevertheless, more investigations are suggested at field level under variable climatic zones to confirm the effectiveness of 0.5ZnT+P with AMF for improvement in rice growth and production.

## Introduction

Poor availability of micronutrients is one of the major hurdles to the achievement of optimum crop productivity [1–4], because these are essential for plants due to the active role in the improvement of photosynthesis, cell membrane structure, nucleic acid and lipid metabolism, hormone activity, protein synthesis, gene expression and defense [5–7]. Nonetheless, high soil pH and poor organic contents in arid and semi-arid areas are major causes of less micronutrients bioavailability [8–10]. Among variable micronutrients, role of Zn is vital in plants growth [11–13]. Zinc is known to be involved in several metabolic as well as structural activities of plants including respiration, photosynthesis, and chlorophyll synthesis [14–16]. Furthermore, enzymes i.e., lyases, classes; oxido-reductases, ligases, isomerase, transferases and hydrolases also require sufficient concentration of Zn for their optimum activities [17]. However, more than 50% of agriculture soils are considered deficient in Zn bioavailability [18].

To overcome this issue, scientists suggest the application of Zn as fertilizer [14–16, 19]. The majority of macro and micronutrients fertilizers are applied in soil [17, 20, 21]. However, deteriorated physical and chemical conditions decrease the nutrients use efficiency (NUE) i.e., nitrogen (30–50%), phosphorus (15–20%) and micronutrients (<2%) [22]. On the other hand, supplementation of micronutrients as the foliar application can play an imperative role in the improvement of nutrient use efficiency [15, 23]. Most of the micronutrients which are applied as foliar, actively become part of plants due to quick absorption in tissue. This method also minimizes the leaching losses and precipitation of micronutrients which are key immobilizing processing in soil [24]. Although potential benefits are majorly associated with the foliar application of micronutrients, the selection of crop stage for foliar application is of prime importance. It is important to identify the potential yield describing the time period in the cultivated crop for the achievement of favorable post-reproductive development by foliar application of micronutrients [22].

The poor management of phosphate fertilizers in soils also decreases Zn availability to the plants. When phosphate fertilizers are applied in large amounts, they make complexes with Zn and decreases their uptake in the plants [25]. Inoculation of arbuscular mycorrhizae (AMF) is considered helpful in avoiding any disturbance in the balance uptake of phosphorus (P) [1, 26]. AMF significantly improve the root elongation, which increases the rhizosphere area where organic secretions regulate the balance uptake of P in plants [11]. Furthermore, improvement in soil characteristics due to improvement in the population of AMF in the soil also facilitate the improvement in growth and yield of crops [26].

Rice is considered an important food in human's diet, as more than 50 million people consume it for their daily intake [27]. It has a significant amount of essential nutrients i.e., N, K, Zn, P, Ca, Fe and Na [28]. A 100 grams of rice grains is considered a source of lipid (~0.3–0.5 g), protein (~6.3–7.1 g), fiber (~0.2–0.5 g), carbohydrate (~77–78 g), riboflavin (~0.02–0.06 mg), thiamine (~0.02–0.11 mg), niacin (~1.3–2.4 mg) and vitamin E (~0.075–0.30 mg) [28]. That's why the current experiment was planned with the aim to check the critical developmental stages of rice for foliar application of Zn in the presence and absence of AMF. The study is covering the knowledge gap of the best developmental stage among panicle and tillering of rice for application of Zn with and without AMF inoculation situation. It is hypothesized that application of Zn at panicle and tillering stages in split may be a better approach than sole application at panicle initiation or tillering stages for improvement in growth and yield of rice with and without AMF inoculation.

## Material and methods

### Experimental site and design

A pot study was conducted in the research area of the Department of Soil Science (71.43° E, 30.2° N and 122 meters above sea level), Bahauddin Zakariya University Multan.

## Treatments

There were four Zn application treatments i.e., control (foliar application of tap water (TW)), 0.5% Zn foliar spray at tillering stage (0.5ZnT), 0.5% Zn foliar spray at panicle stage (0.5ZnP) and 0.5% Zn foliar spray at panicle and tillering stages (0.5ZnP+T). While two levels of AMF were used in the study including No AMF (no AMF inoculated) and AMF. The treatment plan includes TW+AMF, 0.5ZnT+AMF, 0.5ZnP+AMF, 0.5ZnP+T+AMF, TW, 0.5ZnT, 0.5ZnP and 0.5ZnP+T. The experimental treatments were laid out in a completely randomized design (CRD) under the factorial arrangement, and each treatment was replicated three times.

## Pots preparation and soil characterization

Clay pots were utilized for the experiment having 60 cm depth and 45 cm diameter. The soil was sampled from the experimental area. After sieving from a 2mm sieve, 8 kg soil was filled in each pot. A composite sample was also taken for the characterization of soil attributes. The texture was analyzed through the determination of sand, silt and clay; the textural triangle of USDA was utilized for computation of soil texture [21]. For analysis of pH, soil and deionized water paste was made by missing in 1:1 ratio. After that pH of saturated paste was computed using a pre-calibrated pH meter [22]. For assessment of soil EC, 1:10 ratio soil and distilled water mixture were prepared. Extraction was done and then EC of the extract was noted on pre-calibrated (1/100N KCl) EC meter [23]. Ferrous ammonium sulphate and potassium dichromate were utilized for the analysis of soil organic matter [24]. The soil sample was digested at 380°C on the hot plate for analysis of total nitrogen by Kjeldhal's distillation apparatus [25]. For assessment of available phosphorus, Olsen extraction (sodium bicarbonate) was done. Final P was examined on a spectrophotometer at 880nm wavelength [26]. Potassium was examined in the ammonium acetate soil extract on a flame photometer by following the protocol of [27]. For analysis of Zn in soil, DTPA extract was done. The final analysis was performed on atomic absorption spectrophotometer (AAS) [28]. The pre-experimental soil attributes are provided in Table 1.

## Seed purchasing and nursery development

Seed of SUPER BASMATI rice variety was purchased from the certified seed dealer for the plantation of rice nursery. After 25 days of germination, seedlings were transplanted in the pots.

**Table 1. Physico-chemical properties of experimental soil.**

| Soil                  |                     |        | Water        |                       |        |      |
|-----------------------|---------------------|--------|--------------|-----------------------|--------|------|
| Attributes            | Units               | Values | Attributes   | Units                 | Values |      |
| Sand                  | %                   | 55     | EC           | $\mu\text{S cm}^{-1}$ | 360    |      |
| Silt                  |                     | 15     | Carbonates   |                       | meq./L | 0.00 |
| Clay                  |                     | 30     | Bicarbonates |                       |        | 1.02 |
| Texture               | Sandy Clay Loam     |        | Chlorides    |                       | 0.10   |      |
| pHs                   | -                   | 8.23   | Ca+Mg        |                       | 5.61   |      |
| ECe                   | dS/m                | 4.76   | Soluble Zinc | $\text{mg kg}^{-1}$   | 0.10   |      |
| Organic matter        | %                   | 0.45   | pH           | -                     | 6.89   |      |
| Total Nitrogen        | %                   | 0.023  |              |                       |        |      |
| Available phosphorus  | $\text{mg kg}^{-1}$ | 6.55   |              |                       |        |      |
| Extractable potassium |                     | 157    |              |                       |        |      |
| Extractable zinc      |                     | 11.23  |              |                       |        |      |

<https://doi.org/10.1371/journal.pone.0266248.t001>

### AMF inoculation

For AMF inoculation, 10 kg soil was inoculated with 2.5 g mycorrhizal inoculum Clonex® (Root Maximizer; 5711 Enterprise Drive, Lansing, MI, USA). The commercial product had 158 propagule gram<sup>-1</sup> with *Glomus* species, as a major ingredient of the product. At the time of transplantation, AMF inoculation was again applied to the seedling in treatment with AMF application for maximum colonization [1, 10].

### Zinc foliar spray

For the foliar application of Zn, salt of ZnSO<sub>4</sub> was utilized. Each treatment at respective application stages i.e., panicle and tillering received 0.5% Zn solution. The solution of Zn was made in tap water. The characteristics of tap water are also provided in Table 1. For control, only tap water was sprayed during treatment application at panicle and tillering stages.

### Fertilizer application and irrigation

Recommended macronutrients including N, P and K as urea, sulfate of potash (SOP) and diammonium phosphate (DAP) were applied at the rate of 0.84, 0.54 and 0.36g. The N fertilization was done in three splits; half of the total recommended N was added at the time of sowing, while the remaining half was applied in 2 splits i.e., tillering and spike initiation stages [31]. In each pot, 100% FC of water was maintained throughout the experiment [32].

### Gas exchange attributes

Gas exchange attributes were determined by utilizing IRGA [CI-340 Photosynthesis system, CID, Inc. USA] as described by Danish and Zafar-ul-Hye [29] at 45 days after germination. The readings were collected in 45 days old rice plants on a sunny day with an intensity of light saturation between 10:33 and 11:10 AM.

### Chlorophyll contents and electrolyte leakage

For chlorophyll contents assessment, Arnon [30] method was followed. Electrolyte leakage was assessed according to the methodology of [31]. Final calculations were made by using the following equation for electrolyte leakage

$$EL (\%) = \frac{EC1}{EC2} \times 100 \quad (1)$$

### Data collection

Plants were harvested at the time of maturity. Morphological attributes i.e., number of spikes, plant height, 1000 grains weight and spike length were recorded soon after harvesting of the crop. Grains and straw yield were noted via manual separation of grains and straw. After that top weight balance was use for the assessment of grains and straw yield.

### Grains nutrients concentration

Nitrogen in grains was computed by digestion of sample at 400°C with H<sub>2</sub>SO<sub>4</sub>. After digestion distillation was done on Kjeldhal's distillation apparatus [32]. For phosphorus (P) and potassium (K) in grains and straw, digestion was done with di-acid mixture (HNO<sub>3</sub>:HClO<sub>4</sub> = 2:1) [33]. Yellow colour method was used for the final examination of P on the spectrophotometer [34] while a flamephotometer and atomic absorption spectrophotometer were used for K and Zn determination respectively [35, 36].

## Statistical analysis

The standard statistical procedure was followed for statistical analysis of data [37]. Data collected were statistically analyzed using two-way factorial ANOVA. While comparison of each treatment was made by applying the Fisher LSD test ( $p \leq 0.05$ ). Pearson correlation was also computed, and probability graphs were made by using OriginPro 2021 [38].

## Results

Effects of treatments were significant on AMF colonization with roots, plant height, spike length and number of spikes. Results showed that 0.5ZnT+P with AMF remained significantly better compared to all other treatments for the improvement in AMF root colonization. Treatment 0.5ZnT and 0.5ZnP also differed significantly over control (TW+AMF) for AMF colonization with roots. No significant change in AMF colonization with roots was observed where TW and 0.5ZnT were applied as treatments. However, 0.5 ZnP and 0.5 ZnT+P performed significantly better than the control (TW) for enhancement in AMF colonization with roots compared to TW (Fig 1A). For enhancement in plant height, 0.5ZnT+P and 0.5ZnP with AMF remained significantly better than TW. A significant improvement in plant height was also observed in 0.5ZnT with AMF than TW. It was observed that 0.5ZnT+P, 0.5ZnP and 0.5ZnT differed significantly over TW without AMF for enhancement in plant height (Fig 1B). In the case of spike length and number of spikes, 0.5ZnT+P, 0.5ZnP and 0.5ZnT caused a significant increase compared to TW with AMF. Treatments 0.5ZnT+P and 0.5ZnP differed significantly for spike length (Fig 1C) and number of spikes (Fig 1D) over TW without AMF. However, no significant change in spike length and number of spikes was noted where 0.5ZnT was applied than TW without AMF.

The influences of treatments were significant on 1000 grains weight, total chlorophyll and electrolyte leakage. Application of 0.5ZnT+P and 0.5ZnP with and without AMF was significantly different than TW for the enhancement in 1000 grains weight. No significant change was noted in 0.5ZnT with and without AMF for 1000 grains weight than TW (Fig 2A). Treatments 0.5ZnT+P, 0.5ZnP and 0.5ZnT remained significantly better for total chlorophyll compared to TW with and without AMF. Treatments 0.5ZnP and 0.5ZnT remained statistically alike to each other for total chlorophyll in the absence and presence of AMF (Fig 2B). It was noted that 0.5ZnT did not differ significantly for a decrease in electrolyte leakage compared to TW when applied with AMF. However, 0.5ZnT+P and 0.5ZnP with AMF caused a significant decrease in electrolyte leakage over TW. A significant decrease in electrolyte leakage was noted where 0.5ZnT+P, 0.5ZnP and 0.5ZnT without AMF were applied compared to TW (Fig 2C).

The addition of treatments caused a significant change in gas exchange attributes i.e., photosynthetic rate, transpiration rate and stomatal conductance. Application of 0.5ZnT+P and 0.5ZnP with and without AMF remained significantly different than TW for the photosynthetic rate. Treatment 0.5ZnT did not differ significantly for photosynthetic rate compared to TW. Results also showed that 0.5ZnT+P, 0.5ZnP and 0.5ZnT without AMF were significantly better over TW for photosynthetic rate (Fig 3A). A significant change was noted in transpiration rate where 0.5ZnT+P, 0.5ZnP and 0.5ZnT with AMF were applied compared to TW. Compared to TW, 0.5ZnT+P and 0.5ZnP were significantly different but 0.5ZnT showed the non-significant change in transpiration rate without AMF (Fig 3B). It was noted that 0.5ZnT remained non-significant for stomatal conductance than TW when applied with AMF. However, 0.5ZnT+P and 0.5ZnP with AMF differed significantly better over TW for enhancement in stomatal conductance. A significant increase in stomatal conductance was observed in 0.5ZnT+P, 0.5ZnP and 0.5ZnT without AMF over TW (Fig 3C).

It was noted that grains and straw yields were also significantly changed by the addition of treatments. A significant improvement in grains (Fig 4A) and straw yield (Fig 4B) was noted

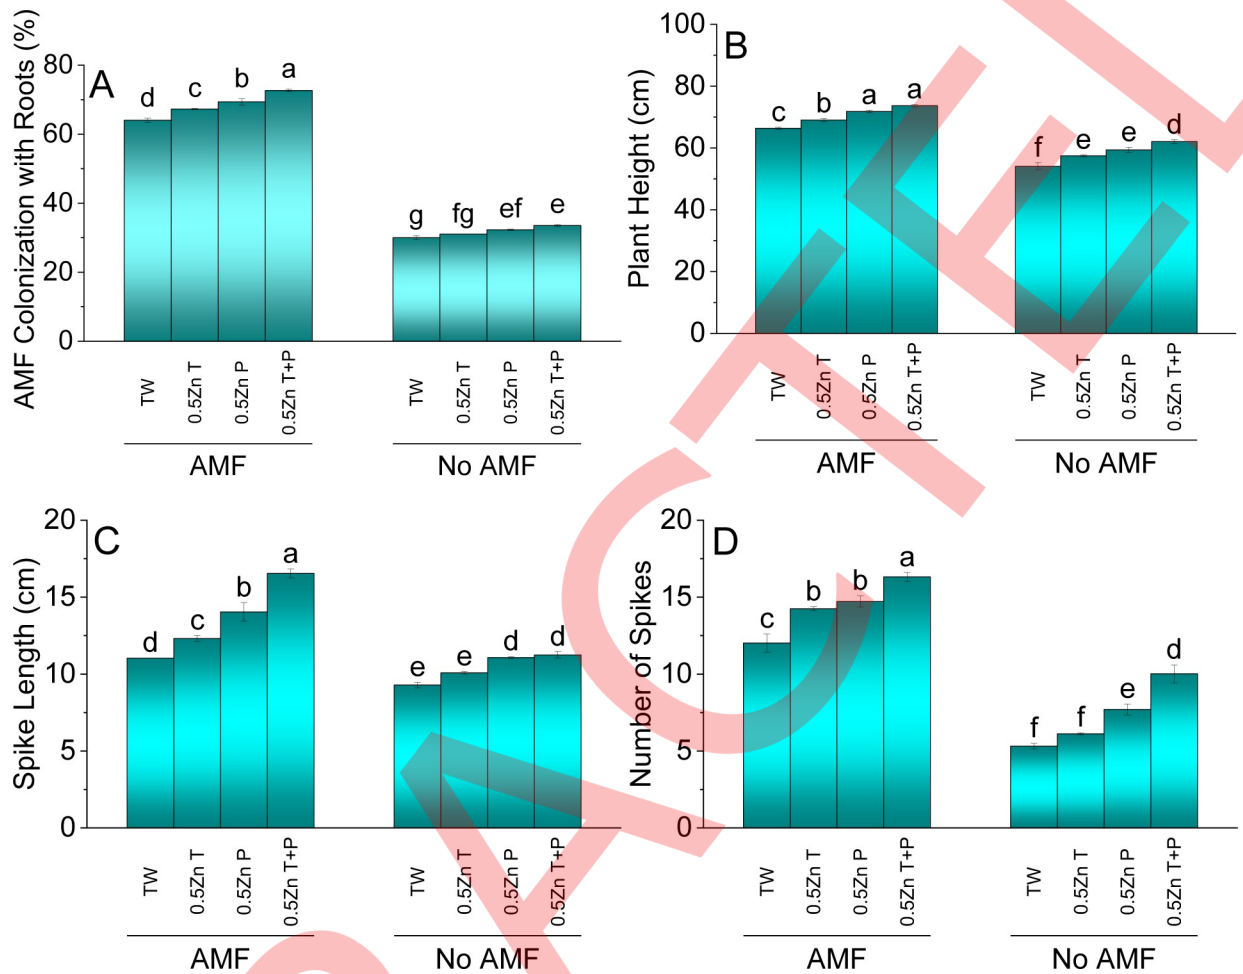

**Fig 1.** Effect of zinc foliar application at tillering and panicle stages with and without AMF inoculation on AMF colonization with roots (A), plant height (B), spike length (C) and number of spikes (D) of rice. Bars are means of three replicates  $\pm$  SE. Variable letters on bars indicate significant difference at  $p \leq 0.05$  according to LSD test. TW = tap water (control); T = tillering stage; P = panicle stage; Zn = zinc.

<https://doi.org/10.1371/journal.pone.0266248.g001>

in 0.5ZnT+P, 0.5ZnP and 0.5ZnT with and without AMF over TW. On average, application of treatments with AMF performed significantly better than without AMF for grains and straw yields.

Application of treatments also caused a significant change in grains N, P, K and Zn accumulation. The addition of 0.5ZnT+P and 0.5ZnP with and without AMF performed significantly better than TW for enhancement in grains N. Treatment 0.5ZnT with and without did not cause any significant change in grains N over TW. For grains P, 0.5ZnT+P cause a significant increase compared to TW (Table 2). Treatments 0.5ZnP and 0.5ZnT were statistically alike with TW in the presence and absence of AMF for grains P. In the case of grains K and Zn, 0.5ZnT+P, 0.5ZnP and 0.5ZnT with and without AMF caused a significant increase over TW (Table 1). Compared to TW, the maximum increase in N (14.5 and 25.7%), P (42.1 and 33.3%), K (22.2 and 30.0%) and Zn (19.3 and 27.8%) was noted in ZnT+P with and without AMF respectively.

Pearson correlation showed that AMF root colonization was significantly and positively correlated with plant height, spike length, number of spikes, 1000 grains weight, total chlorophyll, photosynthetic rate, transpiration rate, stomatal conductance, straw yield, grains N, P

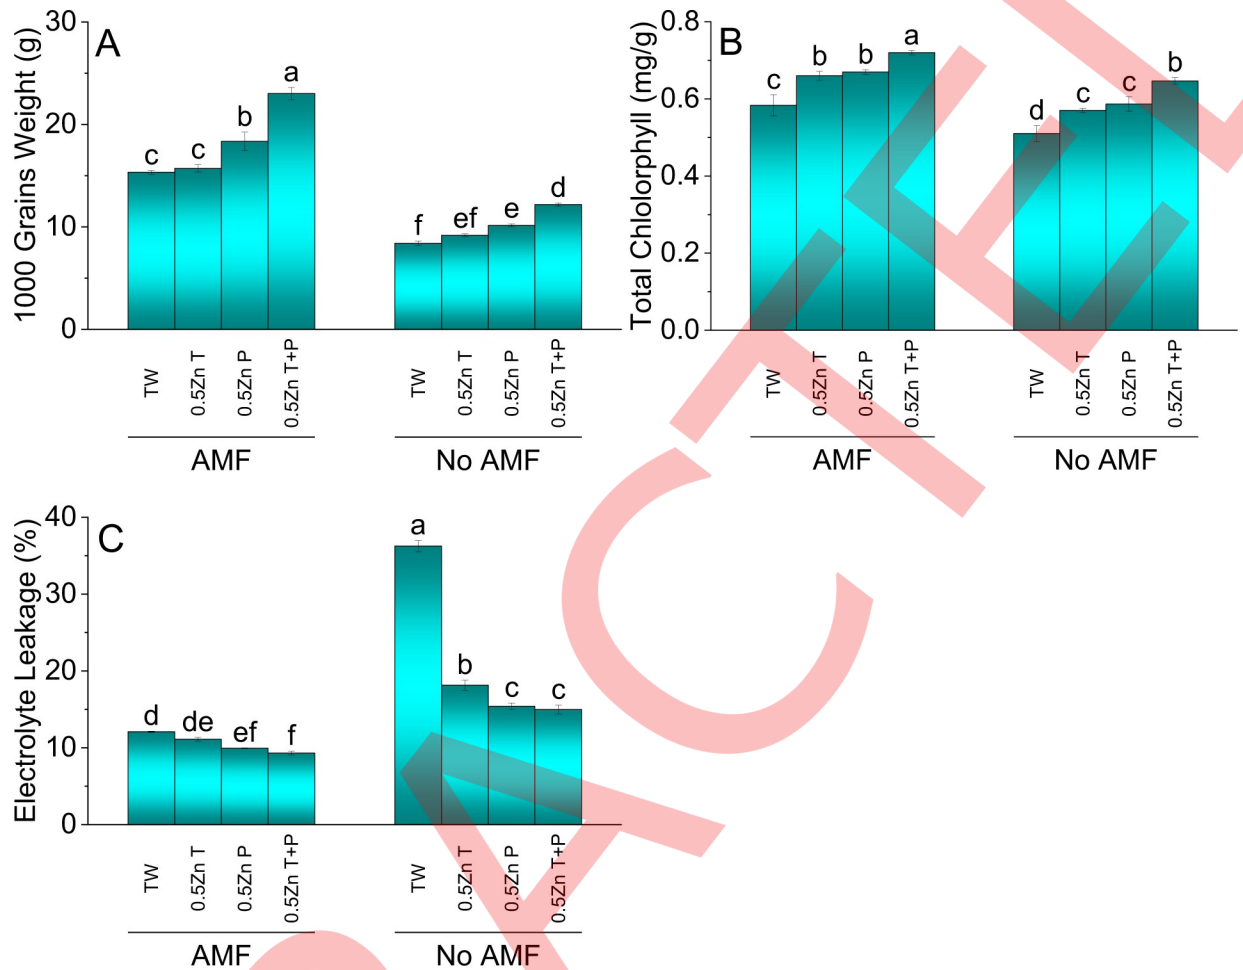

**Fig 2.** Effect of zinc foliar application at tillering and panicle stages with and without AMF inoculation on 1000 grains weight (A), total chlorophyll (B) and electrolyte leakage (C) in rice leaves. Bars are means of three replicates  $\pm$  SE. Variable letters on bars indicate significant difference at  $p \leq 0.05$  according to LSD test. TW = tap water (control); T = tillering stage; P = panicle stage; Zn = zinc.

<https://doi.org/10.1371/journal.pone.0266248.g002>

and Zn concentration. It was also noted that only electrolyte leakage was significant negatively correlated with AMF root colonization and grains Zn concentration. Grains yield was significantly positive in correlation with photosynthetic rate, spikes length, N, P, K concentration in grains and stomatal conductance (Fig 5).

## Discussion

Results of the current study confirmed that application of 0.5% foliar Zn at tillering+panicle stages with AMF significantly enhanced plant height, spike length, number of spikes and 1000 grains weight. The development of symbiosis between plants roots and fungal hyphae significantly enhanced the expansion of roots. Better elongation in roots resulted in optimum uptake of water and nutrients which ultimately improved plant growth [39, 40]. Better root colonization of plants with AMF also positively affected pollen delivery, pollen germination, pollen tube growth, fertilization and germination of seeds [41]. A significant increase in mineral nutrient uptake due to inoculation of AMF in plants is also a key feature that caused improvement in the yield of crops [42]. A similar trend of nutrient improvement was also recorded in current. It was observed that grains N, P, K and Zn concentration was significantly high where

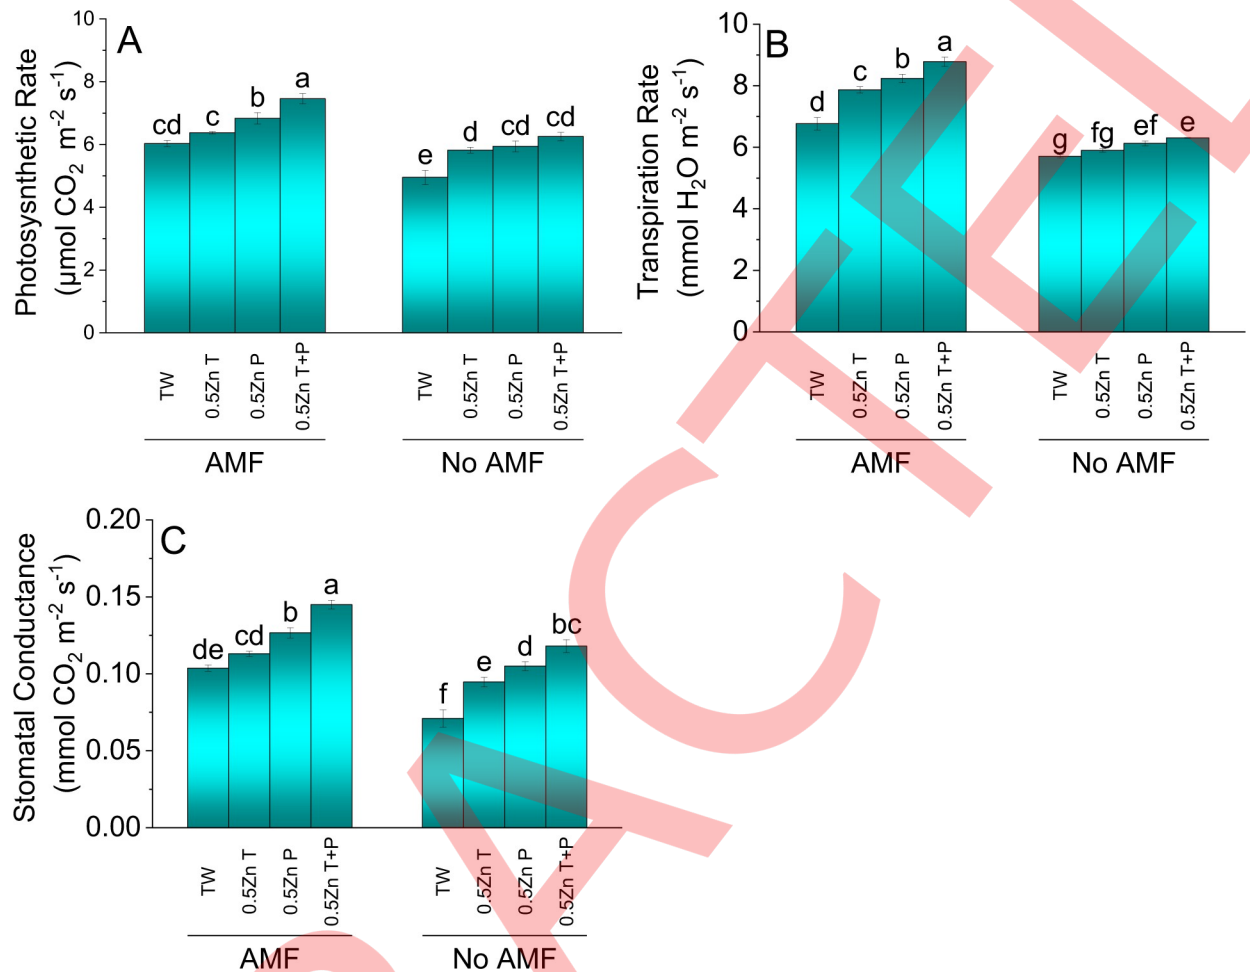

**Fig 3.** Effect of zinc foliar application at tillering and panicle stages with and without AMF inoculation on photosynthetic rate (A), transpiration rate (B) and stomatal conductance (C) in rice leaves. Bars are means of 3 replicas  $\pm$  SE. Variable letters on bars indicate significant difference at  $p \leq 0.05$  according to LSD test. TW = tap water (control); T = tillering stage; P = panicle stage; Zn = zinc.

<https://doi.org/10.1371/journal.pone.0266248.g003>

0.5ZnT+P with AMF was applied over control. The improvement in grain's nutrients was due to mutual positive effects of ZnT+P and AMF. Inoculation of AMF in soil decrease N losses as leaching due to promotion of aggregates formation as a result of organic secretions. Better soil aggregates also facilitate the penetration of air thus minimizing the effects of denitrification N losses. On the other hand, a strong correlation between N uptake and chlorophyll contents regulates the rubisco activity during photosynthesis. This improvement in photosynthesis is also dependent on CO<sub>2</sub> assimilation rate through optimization of stomatal conductance in the plants [43, 44]. Application of 0.5ZnT+P with AMF caused significant improvement in chlorophyll contents and gas exchange attributes i.e., photosynthetic rate and stomatal conductance. The improvement was more prominent in the presence of AMF compared to No AMF. Furthermore, deficiency of Zn also decreases K ions concentration in the guard cells. Such increase in K ions efflux compared to influx caused damage to cell membrane under deficient Zn conditions [45]. However, the role of Zn at tillering+panicle was also significant in the enhancement of chlorophyll contents, photosynthetic rate and stomatal conductance. Balance uptake of Zn in plants improves membrane integrity. This improvement in membrane integrity regulates the stomatal conductance in plants [45]. It has also been observed that less Zn



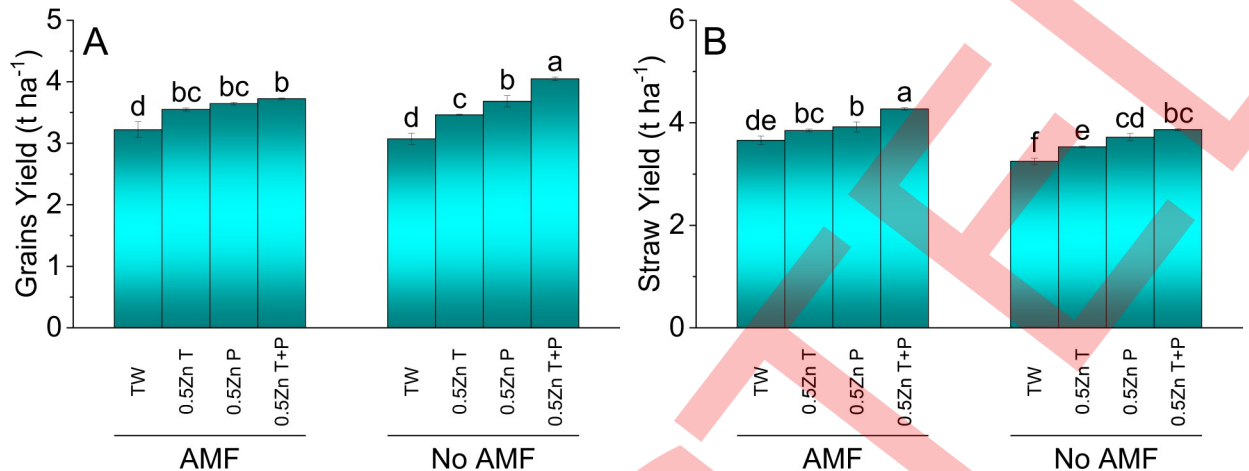

**Fig 4.** Effect of zinc foliar application at tillering and panicle stages with and without AMF inoculation on rice grains yield (A) and straw yield (B). Bars are means of three replicates ± SE. Variable letters on bars indicate significant difference at  $p \leq 0.05$  according to LSD test. TW = tap water (control); T = tillering stage; P = panicle stage; Zn = zinc.

<https://doi.org/10.1371/journal.pone.0266248.g004>

uptake minimize the activity of carbonic anhydrase. The reduction in this activity adversely affects the photosynthesis in plants through disturbance in PS-II and disintegration of Rubisco structure [46, 47]. In the current study, it was noted that AMF also facilitates the better uptake of Zn in grains. This improvement was due to tradeoff mechanism of AMF regarding plant nutrients and Zn uptake. According to this mechanism, AMF inoculation increases the uptake

**Table 2.** Effect of zinc foliar application at tillering and panicle stages with and without AMF inoculation on rice grains nitrogen, phosphorus, potassium and zinc.

| Inoculation | Zinc      | Grains Nitrogen (%)  |       |           | Grains Phosphorus (%)                |       |           |
|-------------|-----------|----------------------|-------|-----------|--------------------------------------|-------|-----------|
|             |           | Mean                 | SE    | Labelling | Mean                                 | SE    | Labelling |
| AMF         | TW        | 11.58                | 0.31  | d         | 0.19                                 | 0.002 | bcd       |
| AMF         | 0.5Zn T   | 12.11                | 0.06  | bcd       | 0.23                                 | 0.015 | ab        |
| AMF         | 0.5Zn P   | 12.42                | 0.21  | bc        | 0.24                                 | 0.007 | ab        |
| AMF         | 0.5Zn T+P | 13.26                | 0.16  | a         | 0.27                                 | 0.036 | a         |
| No AMF      | TW        | 10.14                | 0.04  | e         | 0.15                                 | 0.003 | d         |
| No AMF      | 0.5Zn T   | 10.51                | 0.29  | e         | 0.17                                 | 0.003 | cd        |
| No AMF      | 0.5Zn P   | 11.81                | 0.41  | cd        | 0.18                                 | 0.003 | cd        |
| No AMF      | 0.5Zn T+P | 12.75                | 0.16  | ab        | 0.20                                 | 0.003 | bc        |
| Inoculation | Zinc      | Grains Potassium (%) |       |           | Grains Zinc ( $\mu\text{g g}^{-1}$ ) |       |           |
|             |           | Mean                 | SE    | Labelling | Mean                                 | SE    | Labelling |
| AMF         | TW        | 0.21                 | 0.003 | d         | 26.18                                | 0.47  | c         |
| AMF         | 0.5Zn T   | 0.23                 | 0.003 | c         | 28.18                                | 0.10  | b         |
| AMF         | 0.5Zn P   | 0.26                 | 0.003 | ab        | 28.72                                | 0.36  | b         |
| AMF         | 0.5Zn T+P | 0.27                 | 0.003 | a         | 31.22                                | 0.63  | a         |
| No AMF      | TW        | 0.20                 | 0.003 | e         | 18.67                                | 0.33  | g         |
| No AMF      | 0.5Zn T   | 0.23                 | 0.006 | c         | 20.67                                | 0.33  | f         |
| No AMF      | 0.5Zn P   | 0.25                 | 0.003 | b         | 22.00                                | 0.58  | e         |
| No AMF      | 0.5Zn T+P | 0.26                 | 0.003 | ab        | 23.67                                | 0.33  | d         |

Values are means of 3 replicas ± SE. Variable letters showed significant difference at  $p \leq 0.05$  compared by using Fisher LSD test. TW = tap water (control); T = tillering stage; P = panicle stage; Zn = zinc.

<https://doi.org/10.1371/journal.pone.0266248.t002>

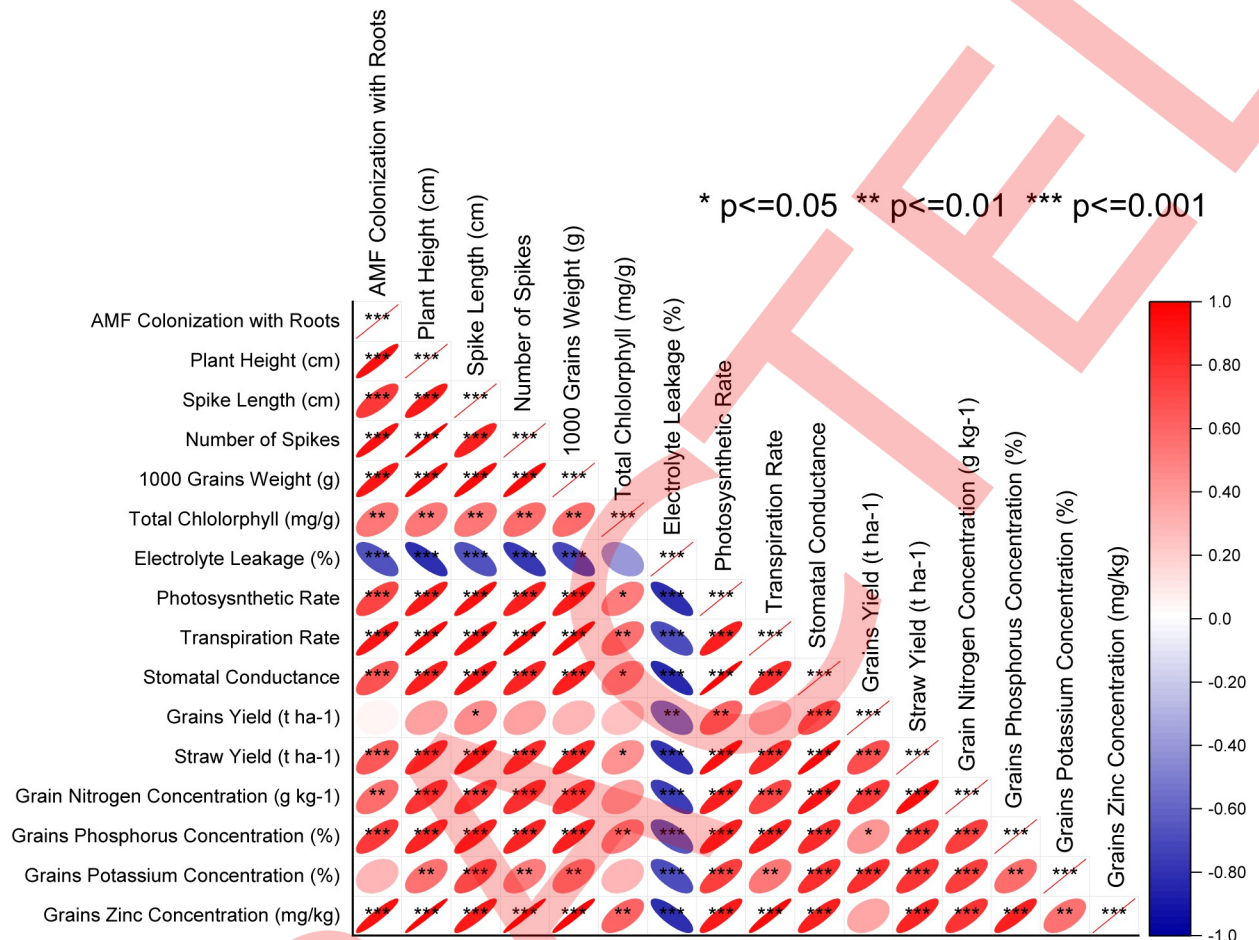

**Fig 5. Pearson correlation for studied rice growth attributes affected zinc application at different growth stages.**

<https://doi.org/10.1371/journal.pone.0266248.g005>

of Zn when plants are cultivated in Zn deficient soils. On the other hand, higher Zn concentration can also cause toxicity in the plants. Inoculated AMF in the current situation played an imperative role in decreasing Zn uptake to provide some relaxation in toxicity for crops [1, 10]. A significant decrease in electrolyte leakage of rice leaves in the current study also validated the above mechanism of balance Zn and other nutrients uptake. As plants were cultivated in Zn deficient soil, the higher electrolyte leakage was associated with the deficiency of Zn. Similarly, the grains Zn was also poor compared to 0.5ZnT+P in the presence and absence of AMF validated the fact of Zn stress in rice plants. According to Matile et al. [48], chlorophyllase activation in the chloroplast played notorious role in the destruction of chlorophyll after direct contact of stress ethylene with cell membrane. Under stress conditions, this stress ethylene become accumulated and degrade the lipid membrane due to which membranes loss their integrity [48]. This might be associated with low chlorophyll contents in control and high electrolyte leakage.

## Conclusions

Foliar application of Zn at tillering and panicle initiation stages improved the growth and yield of rice than control. However, such effects were provoked with AMF inoculation. Sole application of Zn at panicle initiation stage was more effective than its application at tillering for

improvement in 1000 grains weight, and grains nutrient accumulation. In crux, foliar Zn application at tillering+panicle stages with AMF inoculation is better to approach compared to sole application for significant improvement in rice growth and yield. It is suggested to grower to inoculate AMF and apply 0.5%Zn foliar at tillering+panicle stages for better rice crop growth. However, more investigations are suggested on different cereal crops under the agro-climatic zone to declare foliar 0.5%Zn at tillering+panicle as the best treatment.

## Acknowledgments

The paper is part of 1<sup>st</sup> author Ph.D. thesis. This work was funded by Princess Nourah bint Abdulrahman University Researchers Supporting Project number (PNURSP2022R317), Princess Nourah bint Abdulrahman University, Riyadh, Saudi Arabia".

## Author Contributions

**Conceptualization:** Hassan Mehmood, Muhammad Arif Ali, Saddam Hussain.

**Data curation:** Hassan Mehmood, Muhammad Arif Ali, Saddam Hussain.

**Formal analysis:** Hassan Mehmood, Muhammad Arif Ali.

**Investigation:** Hassan Mehmood.

**Supervision:** Muhammad Arif Ali, Saddam Hussain.

**Writing – original draft:** Muhammad Arif Ali, Khurram Shehzad Baig, Haider Sultan, Syed Atif Hasan Naqvi, Muhammad Nadeem Shahid, Shamsher Ali, Eman A. Alhomaidi, Rahul Datta.

**Writing – review & editing:** Muhammad Arif Ali, Saddam Hussain, Khurram Shehzad Baig, Haider Sultan, Syed Atif Hasan Naqvi, Muhammad Nadeem Shahid, Shamsher Ali, Eman A. Alhomaidi, Rahul Datta.

## References

1. Saboor A, Ali MA, Danish S, Ahmed N, Fahad S, Datta R, et al. Effect of arbuscular mycorrhizal fungi on the physiological functioning of maize under zinc-deficient soils. *Sci Rep.* 2021; 11: 18468. <https://doi.org/10.1038/s41598-021-97742-1> PMID: 34531432
2. Sacristán D, González-Guzmán A, Barrón V, Torrent J, Del Campillo MC. Phosphorus-induced zinc deficiency in wheat pot-grown on noncalcareous and calcareous soils of different properties. *Arch Agron Soil Sci.* 2019; 65: 208–223. <https://doi.org/10.1080/03650340.2018.1492714>
3. Rahman N, Hangs R, Peak D, Schoenau J. Chemical and molecular scale speciation of copper, zinc, and boron in agricultural soils of the canadian prairies. *Can J Soil Sci.* 2021; 101: 581–595. <https://doi.org/10.1139/cjss-2020-0162>
4. Hussain S, Shah MAA, Khan A, Ahmad F, Hussain M. Potassium enhanced grain zinc accumulation in wheat grown on a calcareous saline-sodic soil. *Pak J Bot.* 2020; 52: 69–74.
5. Hafeez B. Role of Zinc in Plant Nutrition- A Review. *Am J Exp Agric.* 2013; 3: 374–391. <https://doi.org/10.9734/ajea/2013/2746>
6. Alloway BJ. Zinc in soils and crop nutrition. International Zinc Association, Brussels. 2nd ed. International Fertilizer Industry Association, Paris. Brussels, Belgium and Paris, France: International Zinc Association and International Fertilizer Industry Association.; 2008.
7. Munir M, Khan A, Khan SM, Khan SA, Saeed M, Bari A. Phenology and yield of coarse and fine rice under varying levels of zinc and farmyard manure. *Pak J Bot.* 2020; 52: 557–564.
8. Ahmed N, Umer A, Ali MA, Iqbal J, Mubashir M, Grewal AG, et al. Micronutrients status of mango (*Mangifera indica*) orchards in Multan region, Punjab, Pakistan, and relationship with soil properties. *Open Agric.* 2020; 5: 271–279.
9. Khan MMH, Ahmed N, Irfan M, Ali M, Arif Ali M, Irfan M, et al. Synchronization of Boron Application Methods and Rates is Environmentally Friendly Approach to Improve Quality Attributes of *Mangifera*

- indica L. on Sustainable Basis. Saudi J Biol Sci. 2021; <https://doi.org/10.1016/j.sjbs.2021.10.036>
10. Saboor A, Ali MA, Hussain S, El Enshasy HA, Hussain S, Ahmed N, et al. Zinc nutrition and arbuscular mycorrhizal symbiosis effects on maize (*Zea mays* L.) growth and productivity. Saudi J Biol Sci. 2021; 28: 6339–6351. <https://doi.org/10.1016/j.sjbs.2021.06.096> PMID: 34759753
  11. Saboor A, Ali MA, Ahmed N, Skalicky M, Danish S, Fahad S, et al. Biofertilizer-Based Zinc Application Enhances Maize Growth, Gas Exchange Attributes, and Yield in Zinc-Deficient Soil. Agriculture. 2021; 11: 310. <https://doi.org/10.3390/agriculture11040310>
  12. Ali Z, Ahmad R, Farooq WA, Khan A, Khan AA, Bibi S, et al. Synthesis and Characterization of Functionalized Nanosilica for Zinc Ion Mitigation; Experimental and Computational Investigations. Molecules. 2020; 25. <https://doi.org/10.3390/molecules25235534> PMID: 33255844
  13. Kumar D, Patel KP, Ramani VP, Shukla AK, Meena RS. Management of Micronutrients in Soil for the Nutritional Security. Nutrient Dynamics for Sustainable Crop Production. Springer Singapore; 2020. pp. 103–134. [https://doi.org/10.1007/978-981-13-8660-2\\_4](https://doi.org/10.1007/978-981-13-8660-2_4)
  14. Rafiullah, Tariq M, Khan F, Shah AH, Fahad S, Wahid F, et al. Effect of micronutrients foliar supplementation on the production and eminence of plum. Qual Assur Saf Crop Foods. 2020; 12: 32–40. <https://doi.org/10.15586/qas.v12iSP1.793>
  15. Bibi F, Ahmad I, Bakhsh A, Kiran S, Danish S, Ullah H, et al. Effect of foliar application of boron with calcium and potassium on quality and yield of mango cv. summer bahisht (SB) Chaunsa. Open Agric. 2019; 4. <https://doi.org/10.1515/opag-2019-0009>
  16. Tahir FA, Ahamad N, Rasheed MK, Danish S. Effect of various application rate of zinc fertilizer with and without fruit waste biochar on the growth and Zn uptake in maize. Int J Biosci. 2018; 13: 159–166. <https://doi.org/10.12692/ijb/13.1.159-166>
  17. Zafar-Ul-hye M, Naeem M, Danish S, Fahad S, Datta R, Abbas M, et al. Alleviation of cadmium adverse effects by improving nutrients uptake in bitter melon through cadmium tolerant rhizobacteria. Environ—MDPI. 2020; 7: 54. <https://doi.org/10.3390/environments7080054>
  18. Kopittke PM, Lombi E, Wang P, Schjoerring JK, Husted S. Nanomaterials as fertilizers for improving plant mineral nutrition and environmental outcomes. Environ Sci Nano. 2019; 6: 3513–3524.
  19. Sher ALI, Naveed K, Ahmad G, Khan A, Khan SM, Shah S. Grain zinc and iron enrichment through foliar application augments wheat yield under varying nitrogen regimes. Pakistan J Bot. 2020; 52: 85–94. [https://doi.org/10.30848/PJB2020-1\(25\)](https://doi.org/10.30848/PJB2020-1(25))
  20. Shafi MI, Adnan M, Fahad S, Wahid F, Khan A, Yue Z, et al. Application of single superphosphate with humic acid improves the growth, yield and phosphorus uptake of wheat (*Triticum aestivum* L.) in calcareous soil. Agronomy. 2020; 10: 1224. <https://doi.org/10.3390/agronomy10091224>
  21. Danish S, Younis U, Akhtar N, Ameer A, Ijaz M, Nasreen S, et al. Phosphorus solubilizing bacteria and rice straw biochar consequence on maize pigments synthesis. Int J Biosci. 2015; 5: 31–39. <https://doi.org/10.12692/ijb/5.12.31-39>
  22. Vasundhara D, Chhabra V. Foliar nutrition in cereals: A review. Pharma Innov J. 2021; 10: 1247–1254.
  23. Danish S, Tahir FA, Rasheed MK, Ahmad N, Ali MA, Kiran S, et al. Effect of foliar application of Fe and banana peel waste biochar on growth, chlorophyll content and accessory pigments synthesis in spinach under chromium (IV) toxicity. Open Agric. 2019; 4: 381–390. <https://doi.org/10.1515/opag-2019-0034>
  24. Masood F, Ahmad S, Malik A. Role of Rhizobacterial Bacilli in Zinc Solubilization. In: Tabrez S, Khan, Malik A, editors. Microbial Biofertilizers and Micronutrient Availability. Cham: Springer International Publishing; 2022. pp. 361–377. [https://doi.org/10.1007/978-3-030-76609-2\\_15](https://doi.org/10.1007/978-3-030-76609-2_15)
  25. Bibi F, Saleem I, Ehsan S, Jamil S, Ullah H, Mubashir M, et al. Effect of various application rates of phosphorus combined with different zinc rates and time of zinc application on phytic acid concentration and zinc bioavailability in wheat. Agric Nat Resour. 2020; 54: 265–272. <https://doi.org/10.34044/j.anres.2020.54.3.05>
  26. Wahid F, Fahad S, Danish S, Adnan M, Yue Z, Saud S, et al. Sustainable management with mycorrhizae and phosphate solubilizing bacteria for enhanced phosphorus uptake in calcareous soils. Agriculture. 2020; 10: 334. <https://doi.org/10.3390/agriculture10080334>
  27. Workman D. Rice Exports by Country. World's Top Export. 2019; 16–18.
  28. Juliano BO. Rice in human nutrition. Food and Agriculture Organization of the United Nations. Int. Rice Res. Inst.; 1993.
  29. Danish S, Zafar-ul-Hye M. Co-application of ACC-deaminase producing PGPR and timber-waste biochar improves pigments formation, growth and yield of wheat under drought stress. Sci Rep. 2019; 9: 5999. <https://doi.org/10.1038/s41598-019-42374-9> PMID: 30979925
  30. Arnon DI. Copper enzymes in isolated chloroplasts. Polyphenoloxidase in *Beta vulgaris*. Plant Physiol. 1949; 24: 1. <https://doi.org/10.1104/pp.24.1.1> PMID: 16654194

31. Lutts S, Kinet JM, Bouharmont J. NaCl-induced senescence in leaves of rice (*Oryza sativa* L.) cultivars differing in salinity resistance. *Ann Bot*. 1996; 78: 389–398. <https://doi.org/10.1006/anbo.1996.0134>
32. Bremner M. Nitrogen-Total. In: Sumner DL A.L. S, P P.A., H R.H., LP N., SM A., et al., editors. *Methods of Soil Analysis Part 3 Chemical Methods-SSSA Book Series 5*. Madison, WI, USA: John Wiley & Sons, Inc.; 1996. pp. 1085–1121.
33. Miller O. Nitric-Perchloric Acid Wet Digestion In an Open Vessel. 1st ed. In: Kalra Y, editor. *Reference Methods for Plant Analysis*. 1st ed. Washington, D.C.: CRC Press; 1998. pp. 57–62.
34. Kuo S. Phosphorus. In: Sparks DL, Page AL, Helmke PA, Loeppert RH, Soltanpour PN, Tabatabai MA, et al., editors. *Methods of Soil Analysis Part 3: Chemical Methods*. SSSA, Madison, Wisconsin: John Wiley & Sons, Ltd; 1996. pp. 869–919. <https://doi.org/10.2136/sssabookser5.3.c32>
35. Pratt PF. Potassium. In: Norman AG, editor. *Methods of Soil Analysis: Part 2 Chemical and Microbiological Properties*, 92. John Wiley & Sons, Ltd; 1965. pp. 1022–1030. <https://doi.org/10.2134/agronmonogr9.2.c20>
36. Hanlon EA. Elemental determination by atomic absorption spectrophotometry. 1st ed. In: Kalra Y, editor. *Handbook of Reference Methods for Plant Analysis*. 1st ed. Washington D.C.: CRC Press; 1998. pp. 157–164.
37. Steel RG, Torrie JH, Dickey DA. *Principles and Procedures of Statistics: A Biometrical Approach*. 3rd ed. Singapore: McGraw Hill Book International Co.; 1997.
38. OriginLab Corporation. OriginPro. Northampton, MA, USA.: OriginLab; 2021. Available: <https://store.originlab.com/store/Default.aspx?CategoryID=59&ItemID=EF-096N0P-ESTU>
39. Basu S, Rabara RC, Negi S. AMF: The future prospect for sustainable agriculture. *Physiol Mol Plant Pathol*. 2018; 102: 36–45.
40. Begum N, Qin C, Ahanger MA, Raza S, Khan MI, Ashraf M, et al. Role of Arbuscular Mycorrhizal Fungi in Plant Growth Regulation: Implications in Abiotic Stress Tolerance. *Front Plant Sci*. 2019; 10: 1068. <https://doi.org/10.3389/fpls.2019.01068> PMID: 31608075
41. Bennett AE, Meek HC. The influence of arbuscular mycorrhizal fungi on plant reproduction. *J Chem Ecol*. 2020; 46: 707–721. <https://doi.org/10.1007/s10886-020-01192-4> PMID: 32583094
42. Turrini A, Avio L, Giovannetti M, Agnolucci M. Functional complementarity of arbuscular mycorrhizal fungi and associated microbiota: the challenge of translational research. *Front Plant Sci*. 2018; 9: 1407. <https://doi.org/10.3389/fpls.2018.01407> PMID: 30319670
43. Valkov VT, Sol S, Rogato A, Chiurazzi M. The functional characterization of LjNRT2. 4 indicates a novel, positive role of nitrate for an efficient nodule N<sub>2</sub>-fixation activity. *New Phytol*. 2020; 228: 682–696. <https://doi.org/10.1111/nph.16728> PMID: 32542646
44. Coskun D, Britto DT, Shi W, Kronzucker HJ. How plant root exudates shape the nitrogen cycle. *Trends Plant Sci*. 2017; 22: 661–673. <https://doi.org/10.1016/j.tplants.2017.05.004> PMID: 28601419
45. Sharma PN, Tripathi A, Bisht SS. Zinc requirement for stomatal opening in cauliflower. *Plant Physiol*. 1995; 107: 751–756. <https://doi.org/10.1104/pp.107.3.751> PMID: 12228399
46. Tsonev T, Cebola Lidon FJ. Zinc in plants—an overview. *Emirates J Food & Agric*. 2012; 24: 322–333.
47. Waraich EA, Ahmad R, Saifullah, Ashraf MY, Ehsanullah. Role of mineral nutrition in alleviation of drought stress in plants. *Aust J Crop Sci*. 2011; 5: 764–777.
48. Matile P, Schellenberg M, Vicentini F. Planta Localization of chlorophyllase in the chloroplast envelope. *Planta*. 1997; 201: 96–99. <https://doi.org/10.1007/BF01258685>
